# Supplementary material
Source: Springer Nature journal article supplement (https://www.springermedizin.de/resource/supplementary/12887_2009_325_MOESM1_ESM.pdf/9474838)
Supplement: MOESM1 [file 9474838]

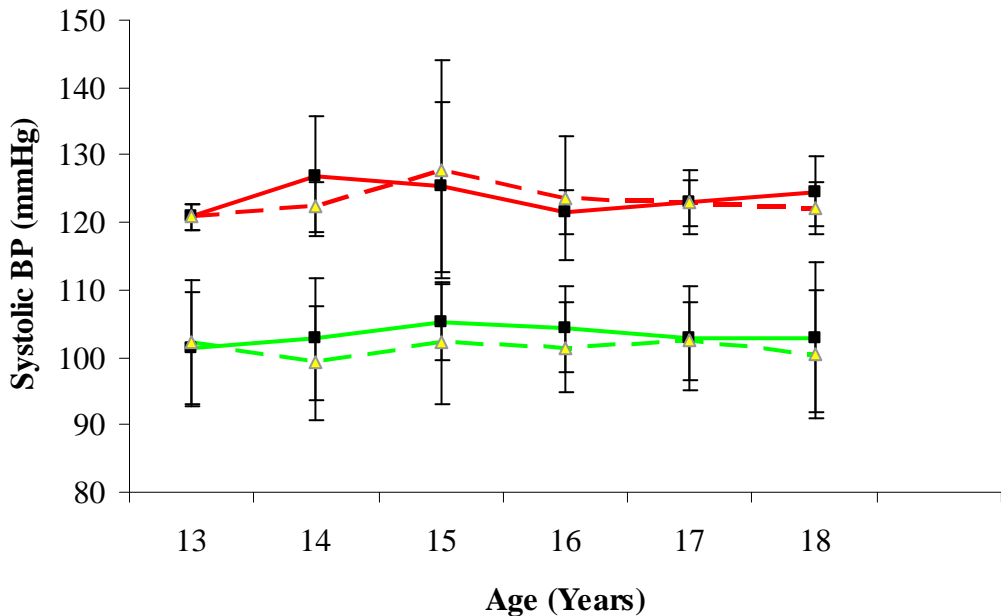

■ Boys NBP   
 ■ Boys EBP   
 ▲ Girls NBP   
 ▲ Girls EBP

BP, NBP and EBP represent blood pressure, normal blood pressure and elevated blood pressure respectively.
